# Supplementary material for: Distinct single-component adjuvants steer human DC-mediated T-cell polarization via Toll-like receptor signaling toward a potent antiviral immune response
Source: PubMed Central journal article supplement — Proc Natl Acad Sci U S A. 2021 Sep 24;118(39):e2103651118. doi: 10.1073/pnas.2103651118 (PMC8488681; doi:10.1073/pnas.2103651118), 2021-09-24
Supplement: pnas.2103651118.sapp.pdf [file pnas.2103651118.sapp.pdf]

## **Supplementary Material and Methods**

### **Human primary cells**

Human peripheral blood mononuclear cells (PBMCs) were isolated from anonymized buffy coats (DRK-Blutspendedienst Hessen GmbH) by applying a density gradient centrifugation (Histopaque® 1077, Sigma-Aldrich). CD14<sup>+</sup> monocytes were separated by positive selection using MACS (Miltenyi Biotec). Subsequently, monocytes were cultivated in complete media (CM) consisting of RPMI 1640 (Biowest), 10% fetal calf serum (FCS), 50 µM β-mercaptoethanol (both Sigma-Aldrich), 2mM L-glutamine, 100 U/ml penicillin, 100 µg/ml streptomycin and 10 mM HEPES (all from Biochrom AG). For the generation of monocyte-derived dendritic cells (moDCs), media were supplemented with 10 ng/ml interleukin 4 (IL-4; Gibco™) and 5 ng/ml recombinant human granulocyte macrophage stimulating factor (GM-CSF (Leukine®; Bayer Healthcare Pharmaceutical) for 5-6 days of cultivation, with a medium refresh on day 3 (37°C, 5% CO<sub>2</sub>). Autologous peripheral blood lymphocytes (PBL, CD14<sup>-</sup> fraction) were collected and frozen in CM containing 30% FCS and 10% DMSO (Sigma-Aldrich).

### **Cell lines**

HLA-A\*02:01–positive TAP-deficient 174CEM.T2 (T2) cells (generously gifted by Prof. J.P. Schneck, Johns Hopkins School of Medicine) were cultured in B' medium containing RPMI 1640 (Biowest), 10% FCS (Sigma-Aldrich), 10 mM MEM NEAA, MEM vitamin solution, 100 mM MEM sodium pyruvate (all Gibco™), 2 mM L-glutamine, 100 U/ml penicillin, 100 µg/ml streptomycin (all from Biochrom AG) at 37°C with 5% CO<sub>2</sub>.

### **DC maturation**

Maturation of DCs was assessed after 24 h of adjuvant stimulation by flow cytometry. Surface marker expression (as geometric mean fluorescence intensity on CD14<sup>-</sup>CD1a<sup>+</sup> DCs) was

examined using the following antibodies and corresponding isotype controls as defined by the manufacturer: CD40 (5C3), CD80 (2D10), CCR7 (G043H7), PD-L1 (29E.2A3, all Biolegend), CD86 (2331, BD Bioscience). The geo. MFI values of the isotype control were subtracted from the geo. MFI values of the specific antibody staining.

### **Receptor expression**

Expression of TLR2, TLR4, TLR7 and MyD88 on Lymphocytes or iDCs was assessed by flow cytometry after staining of cells (CD282/TLR2 clone T2.5, TLR4 clone HTA125, both Biolegend; TLR7 clone 533707; MyD88 clone 316628, both R&D Systems).

Expression of TLR8 and Mincle as well as the housekeeping genes GAPDH and RPL13 was determined by gene-specific PCR. To this end, mRNA was isolated from DCs or PBLs using the RNAeasy kit (Qiagen), followed by reverse transcription into cDNA. Primer sequences for PCR are derived from publications (1, 2) or designed by our lab and are shown in Table S3.

### **Endocytosis of FITC-dextran**

FITC-dextran (50 µg/ml) was given to the culture for an additional hour after 24 h stimulation with the immunomodulators. Replicates at 4°C served as negative control for the phagocytic uptake of FITC-dextran. After thorough washing, cells were stained for CD14 and CD1a to assess the uptake of FITC-dextran (geo. MFI) on CD14<sup>-</sup>CD1a<sup>+</sup> DCs. The geo. MFI values obtained at 4°C were subtracted from the geo. MFI values obtained at 37°C. For representative microscopic pictures, DCs were labelled with CellTrace™ Far Red Cell Proliferation Kit (Thermo Fisher Scientific) before stimulation. After harvesting and extensive washing, cells were stained with Hoechst 33342 (Immunochemistry Technologies) and centrifuged on glass slides using a CellSpin II cytocentrifuge (Tharmac). After short air-drying, mounting fluid (IMAGEN™; glycerol solution, pH 10 with an anti-fading agent) was added and cells were analyzed with a Zeiss Axio Observer Z1 fluorescence microscope.

## **Luminex analysis**

DC:PBL co-cultures of a total of 30 donors, (15 men, 15 women), evenly distributed in age (two groups: > 40 years and < 40 years), were set up as described above. Cell supernatants were harvested 24 h after adjuvant stimulation. Briefly, plates were centrifuged and 100µl (75% of well volume) were transferred to another 96 well plate. Plates were tightly sealed and frozen at -80°C immediately until analysis with Luminex xMAP technology using a Bio-Plex200 system (Biorad). The 25 analytes (ProCartaplex custom panel 25-plex, Invitrogen) were organized on one multiplex array and a single batch of reagents was used for testing all samples. The least detectable dose (LDD) was derived by averaging the values obtained with sample diluent of 169 blank reads and adding three standard deviations of the mean. LDD and lower limit of quantitation (LLOQ) of the tested analytes are displayed in table S2. For PCA analysis using the QluCore software, undetected values (OOR <) were replaced by 10% of the least detectable dose, whereas saturated values (OOR >) were replaced by 10x of the upper limit of quantification. The subsequent cytokine analysis is based on the mean of biological duplicates. DC:PBL co-cultures of a second set of 10-12 donors were set up as described above. In addition to 24 h, cell supernatants were harvested after 5 days of adjuvant stimulation. To this end, cells were sedimented, and supernatant was transferred to another 96 well plate. Plates were tightly sealed and frozen at -80°C immediately until analysis employing ELISA (Human IL-4 ELISA MAX Standard Set) or the Legendplex™ *Human Inflammation Panel 1* kit. Legendplex™ Data Analysis was performed using the Legendplex™ Data Analysis Software Suite (all Biolegend).

## **Antigen-independent lymphocyte proliferation assay**

To assess the proliferation of lymphocytes, moDCs and thawed autologous PBLs were labelled with CFSE (Sigma-Aldrich) at a final concentration of 4µM for 10 min at 37°C prior to co-

culturing and stimulation with the immunomodulators. After 6-7 days, cells were harvested and stained for CD3 (clone: UCHT1), CD4 (RPA-T4), CD8 (SK1), CD56 (HCD56) and CD19 (HIB19, all Biolegend). Proliferating cells were identified by exhibiting a lower intensity of CFSE as measured by flow cytometry. 123count eBeads™ Counting Beads (eBioscience, Thermo Fisher Scientific) were spiked in and acquired during sample analysis, allowing the calculation of the absolute cell count of proliferating lymphocytes within the respective sample. In addition, lymphocyte activation 24 h or 5 days after stimulation with the immunomodulators was determined by staining for CD69 (clone: FN50) or CD25 (BC96; both Biolegend), respectively.

### **pDC viability**

To assess the presence and abundance of viable plasmacytoid dendritic cells within the DC:PBL co-culture 24 h or 6 days after stimulation with the immunomodulators, we determined the cells double positively stained for CD303 (clone: 201A) and CD123 (6H6; both Biolegend) of the viable single CD14<sup>-</sup>/CD3<sup>-</sup>/CD56<sup>-</sup>/CD19<sup>-</sup>/CD45RA<sup>+</sup> cell fraction (CD14 clone MφP9, BD and CD45RA clone HI100, Biolegend).

### **Flow cytometry**

To prevent non-specific staining, cells were first incubated in blocking buffer (PBS/ 10 % FCS/ 10 % huAB serum), followed by staining with specific antibodies or isotype controls and a fixable viability dye (Zombie Yellow, Biolegend). Intracellular protein analysis required fixation and permeabilization using BD's Cytotfix/Cytoperm™ solution kit according to manufacturer's instruction. Samples were acquired using LSR II SORP or LSR Fortessa flow cytometer (BD Bioscience) and analyzed with FlowJo™ software (v10.16.1, BD).

### **Antigen-specific T cell experiments**

PBMCs from donors with the HLA characteristic DRB1\*11:01 were isolated from whole blood as described above. Blood sampling of donors, HLA-typing, and the experimental procedure was approved by the local ethics committee (with ethical allowance #19-226; ethical committee Frankfurt, faculty of Medicine Goethe-University Frankfurt) and informed, written consents were obtained from all donors. HLA-A\*02:01 positive donors were selected from anonymized buffy coats obtained from the DRK Blutspendedienst Hessen GmbH using an HLA-A2 antibody (BB7.2, Biolegend). DCs were harvested on day 5-6 and pulsed with 10  $\mu$ M of the respective peptide (Influenza matrix protein 1, FluM1<sub>58-66</sub>, GILGFVFTL, Innovagen; tetanus toxoid, TT p<sub>2829-844</sub>, MQYIKANSKFIGITEL, MBL) in serum-free media for 2 hours at 37°C. DCs that were not loaded with peptide served as control cells. Peptide-pulsed and control DCs were washed extensively to remove unbound peptide. Autologous CD14<sup>-</sup> PBLs were thawed and untouched CD4<sup>+</sup> or CD8<sup>+</sup> T cells were obtained using respective EasySep™ isolation kits (Stemcell™ technologies). CFSE-labeled (4 $\mu$ M CFSE for 10 min) CD4<sup>+</sup> or CD8<sup>+</sup> T cells were co-cultured in a 1:5 DC:T cell ratio and stimulated with the adjuvants as written above. Additional 20 IU/ml IL-2 (Novartis) was given to the DC:CD8<sup>+</sup> co-culture. After 6-7 days of culture, T cells were harvested and analyzed for polyfunctionality, the expression of inhibitory markers or peptide specificity. Therefore, T cells were stained using HLA-A\*02:01-GILGFVFTL or HLA-DRB1\*11:01-MQYIKANSKFIGITEL PE tetramers (MBL) and T cell-identifying antibodies (CD3 (UCHT1), CD4 (RPA-T4) or CD8 (SK1)).

### **Polyfunctionality**

T2 cells were pulsed with 1  $\mu$ M FluM1 or control peptide (NY-ESO-1; SLLMWITQV, iba) for 1 hour and washed several times. FluM1-expanded CD8<sup>+</sup> T cells were harvested and added to the peptide-presenting T2 cells at a 1:1 ratio in the presence of monensin/brefeldin A, anti-CD28/CD49d co-stimulus (all from BD Biosciences) and CD107A (H4A3, Biolegend) antibody. The same setting, but without T2 cells and CD28/CD49d co-stimulus, was used for

the negative control as well as for the positive control, to which the cell activation cocktail PMA/Ionomycin (Biolegend) was added. After 6 hours, cells were washed twice, blocked and stained with viability dye, anti-CD3 (UCHT1), anti-CD8 (SK1) and FluM1-tetramer. After fixation and permeabilization, cells were stained with anti-IL-2 (MQ1-17H12), anti-TNF $\alpha$  (Mab11) and anti-IFN $\gamma$  (4S.B3, all from Biolegend) for another hour.

**Expression of inhibitory markers** FluM1-expanded CD8<sup>+</sup> T cells were harvested and stained with FluM1-tetramer and for the inhibitory expression markers PD-1 (EH12.2H7), PD-L1 (29E.2A3), LAG3 (11C3C65), CTLA-4 (L3D10), Tim (F38-2E2, all from Biolegend).

## Supplementary tables and figures including legends

**Table S1: Immunomodulators used to investigate and compare their immunogenic properties**

| Immunomodulator                                                 | Abbreviation        | Information                               | Low concentration | High concentration |
|-----------------------------------------------------------------|---------------------|-------------------------------------------|-------------------|--------------------|
| Trehalose-6,6-dibehenate VacciGrade™                            | TDB                 | Mincle ligand                             | 1 $\mu$ g/ml      | 10 $\mu$ g/ml      |
| Pam3CSK4 VacciGrade™                                            | Pam                 | TLR1/2 ligand                             | 100 pg/ml         | 1 $\mu$ g/ml       |
| Gardiquimod VacciGrade™                                         | GARD                | TLR7 ligand                               | 0.35 $\mu$ M      | 3 $\mu$ M          |
| Imiquimod VacciGrade™                                           | IMQ                 | TLR7 ligand                               | 3.6 $\mu$ M       | 36 $\mu$ M         |
| Resiquimod VacciGrade™                                          | R848                | TLR7/8 ligand                             | 0.15 $\mu$ M      | 1 $\mu$ M          |
| Positive control (LPS-EB, ultrapure)                            | LPS                 | TLR4 ligand                               | 38.4 pg/ml        | 0.1 $\mu$ g/ml     |
| Synthetic monophosphoryl lipid A VacciGrade™                    | MPL-s               | TLR4 ligand                               | 0.01 $\mu$ g/ml   | 1 $\mu$ g/ml       |
| Monophosphoryl lipid A ( <i>S. minnesota R595</i> ) VacciGrade™ | MPL-SM              | TLR4 ligand                               | 0.01 $\mu$ g/ml   | 1 $\mu$ g/ml       |
| Addavax™                                                        | ADX                 | squalene-based oil-in-water nano-emulsion | 15 $\mu$ g/ml     | 150 $\mu$ g/ml     |
| Quil-A® adjuvant                                                | Quil                | saponin adjuvant                          | 0.15 $\mu$ g/ml   | 1.5 $\mu$ g/ml     |
| Alhydrogel® 2%                                                  | Al(OH) <sub>3</sub> | aluminum hydroxide wet gel suspension     | 1 $\mu$ g/ml      | 10 $\mu$ g/ml      |

**Table S2: Parameters of the Luminex xMAP immunoassay.**

| Analytes                                         | Abbreviation  | Units | mean LDD* | [min;max] - std            | mean LLOQ** | [min;max] - std         |
|--------------------------------------------------|---------------|-------|-----------|----------------------------|-------------|-------------------------|
| Granulocyte Colony-Stimulating Factor            | G-CSF         | pg/mL | 159.2     | [5.73 ; 648.40] - 194.26   | 30          | [2.56 ; 186.92] - 46.49 |
| Granulocyte-Macrophage Colony-Stimulating Factor | GM-CSF        | pg/mL | 11.6      | [0.01 ; 28.77] - 6.64      | 8.1         | [2.40 ; 14.65] - 5.45   |
| Interferon alpha                                 | IFN-A         | pg/mL | 1.6       | [0.55 ; 3.43] - 0.79       | 0.4         | [0.12 ; 0.59] - 0.18    |
| Interferon gamma                                 | IFN-G         | pg/mL | 21.5      | [7.20 ; 77.40] - 13.01     | 6.41        | [2.62 ; 11.98] - 4.47   |
| Interleukin-1 alpha                              | IL-1A         | pg/mL | 6.3       | [0.01 ; 13.08] - 3.55      | 1.7         | [0.18 ; 2.98] - 1.10    |
| Interleukin-1 beta                               | IL-1B         | pg/mL | 4.1       | [1.72 ; 7.55] - 1.26       | 1.8         | [0.49 ; 2.26] - 0.61    |
| Interleukin-10                                   | IL-10         | pg/mL | 1.3       | [0.005 ; 4.41] - 0.93      | 0.9         | [0.48 ; 1.99] - 0.65    |
| Interleukin-12 Subunit p70                       | IL-12p70      | pg/mL | 3.4       | [0.01 ; 27.16] - 5.44      | 3.5         | [2.68 ; 11.90] - 2.28   |
| Interleukin-17A                                  | IL-17A        | pg/mL | 9.7       | [0.07 ; 29.06] - 8.04      | 5.3         | [0.53 ; 7.75] - 2.68    |
| Interleukin-18                                   | IL-18         | pg/mL | 6.3       | [0.17 ; 30.94] - 5.76      | 5.6         | [3.39 ; 14.45] - 4.20   |
| Interleukin-2                                    | IL-2          | pg/mL | 16.9      | [3.30 ; 39.92] - 7.98      | 13.2        | [5.65 ; 25.83] - 9.46   |
| Interleukin-23                                   | IL-23         | pg/mL | 56.5      | [20.33 ; 133.38] - 26.61   | 21.9        | [0.34 ; 68.55] - 21.39  |
| Interleukin-27                                   | IL-27         | pg/mL | 239.8     | [42.52 ; 2142.96] - 505.76 | 58.2        | [6.88 ; 240.45] - 39.58 |
| Interleukin-3                                    | IL-3          | pg/mL | 305.3     | [62.18 ; 1343.36] - 298.48 | 58.6        | [7.56 ; 261.10] - 60.17 |
| Interleukin-33                                   | IL-33         | pg/mL | 8.1       | [1.11 ; 32.05] - 8.20      | 3.9         | [0.18 ; 12.26] - 4.00   |
| Interleukin-4                                    | IL-4          | pg/mL | 26.6      | [1.88 ; 165.82] - 30.98    | 10.6        | [2.22 ; 39.77] - 9.54   |
| Interleukin-5                                    | IL-5          | pg/mL | 32.5      | [0.68 ; 93.72] - 22.25     | 19.6        | [2.51 ; 41.23] - 15.41  |
| Interleukin-6                                    | IL-6          | pg/mL | 13.2      | [0.11 ; 35.22] - 8.68      | 3.3         | [1.68 ; 7.41] - 2.42    |
| Interleukin-8                                    | IL-8          | pg/mL | 26.3      | [0.05 ; 202.20] - 36.35    | 5.6         | [0.56 ; 9.99] - 4.19    |
| Monocyte Chemotactic Protein 1                   | MCP-1         | pg/mL | 8.0       | [2.13 ; 24.16] - 5.92      | 4.3         | [0.90 ; 14.94] - 4.07   |
| C-X-C motif chemokine 9                          | MIG (CXCL9)   | pg/mL | 27.9      | [0.53 ; 74.06] - 20.51     | 9.6         | [1.71 ; 46.11] - 11.67  |
| Macrophage Inflammatory Protein-1 alpha          | MIP-1A        | pg/mL | 8.0       | [1.15 ; 25.95] - 4.92      | 2.1         | [0.31 ; 7.10] - 2.11    |
| C-C motif chemokine 5                            | RANTES (CCL5) | pg/mL | 4.3       | [0.47 ; 17.81] - 4.34      | 1.5         | [0.27 ; 3.57] - 1.18    |
| Stem Cell Factor                                 | SCF           | pg/mL | 2.9       | [0.01 ; 6.90] - 1.66       | 2.2         | [0.27 ; 6.22] - 2.04    |
| Tumor Necrosis Factor alpha                      | TNF-A         | pg/mL | 15.2      | [6.31 ; 41.61] - 8.24      | 5.3         | [1.51 ; 9.93] - 3.63    |

\* The least detectable dose (LDD) was determined as the mean + 3 standard deviations of 169 blank readings. Results below the LDD are more variable than results above the LDD.

\*\* The LLOQ (Lower Limit of Quantitation) is the lowest concentration of an analyte in a sample that can be reliably detected.

As the LLOQ and the LDD values are independent from each other, on occasion the LLOQ is lower than the LDD.

**Table S3: PCR primers used in this study.**

|             | Sequence                   | Reference                      |
|-------------|----------------------------|--------------------------------|
| hTLR8 for   | CAGATTAGCAGGCGTAACACATCA   | Caron et al. (2005) J Immunol  |
| hTLR8 rev   | AATGTCACAGGTGCATTCAAAGGG   | Caron et al. (2005) J Immunol  |
| hMincle for | TCGAGGGTCAGTGGCAATG        | Ostrop et al. (2015) J Immunol |
| hMincle rev | GTTGTGCCTTCTTCTTAAGAGATT   | Ostrop et al. (2015) J Immunol |
| RPL 13 for  | TCAAAGCCTTCGCTAGTCTCC      |                                |
| RPL 13 rev  | GGCTCTTTTGCCCGTATGC        |                                |
| GAPDH for   | GAG TCA ACG GAT TTG GTC GT |                                |
| GAPDH rev   | TTG ATT TTG GAG GGA TCT CG |                                |

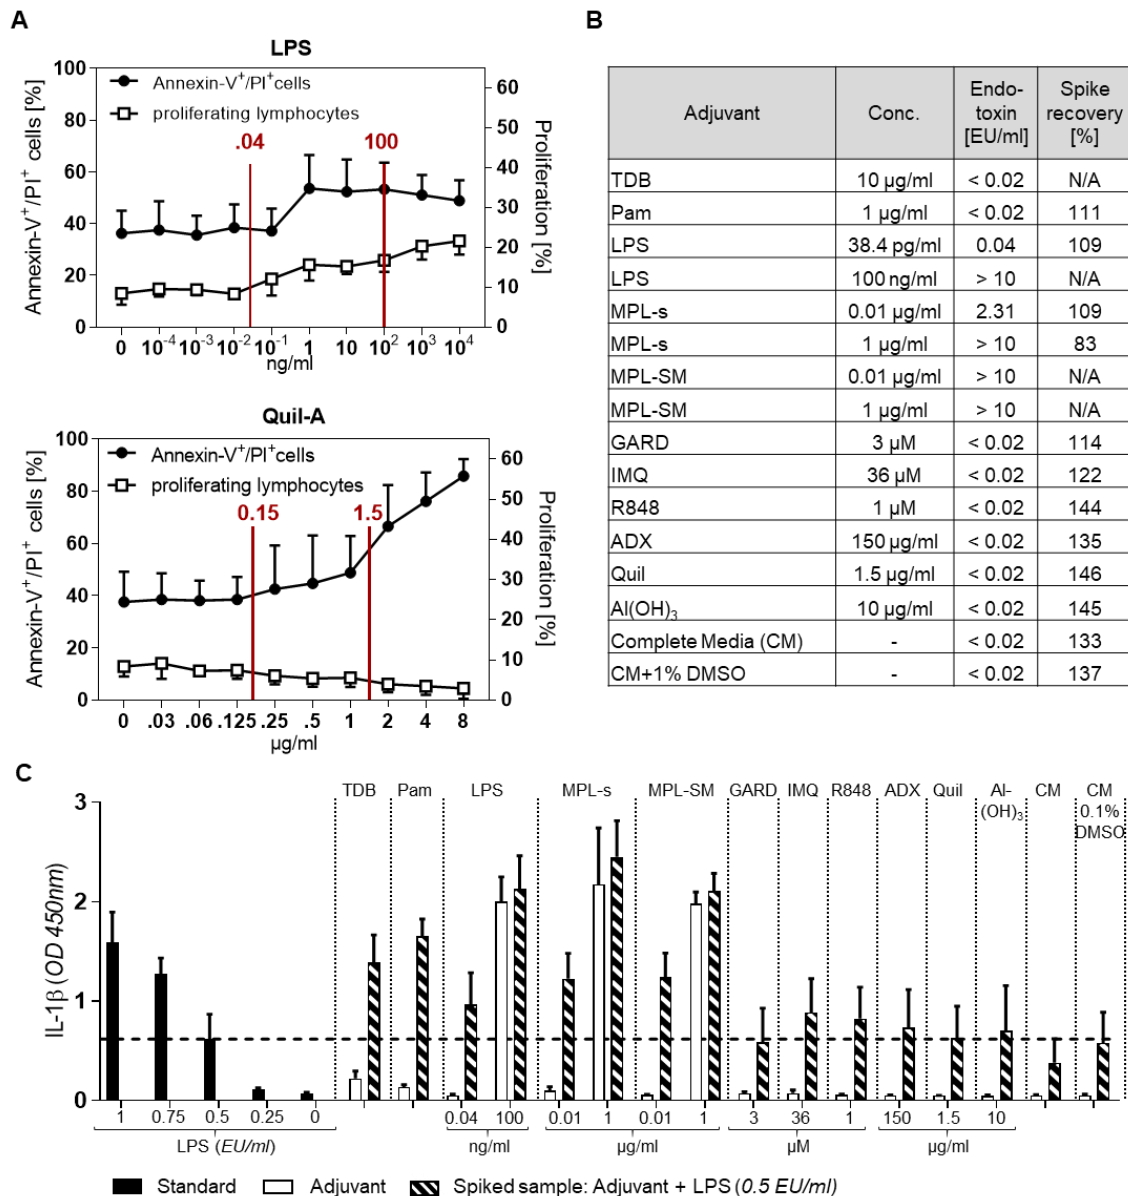

**Fig. S1: Definition of suitable working concentrations.**

A) Adjuvants' concentrations were defined by assessing cytotoxicity with an annexin-V/ PI staining (filled black dots) and the induction of lymphocyte proliferation (white squares). Red vertical lines indicate the chosen low and high concentration for the exemplarily depicted LPS and Quil-A. B) Adjuvants were tested for endotoxin contamination using Limulus amoebocyte lysate (LAL; turbidimetric method) and an endotoxin spike-in of 0.5 EU/ml LPS. C) Pyrogenicity of the adjuvants was analyzed by the monocyte activation test (MAT) on cryopreserved human blood pooled from several donors. After 24 hour incubation with the controls, adjuvants or standards, IL-1 $\beta$  concentrations in cell supernatants were analyzed by ELISA. Data are representative of at least three independent experiments.



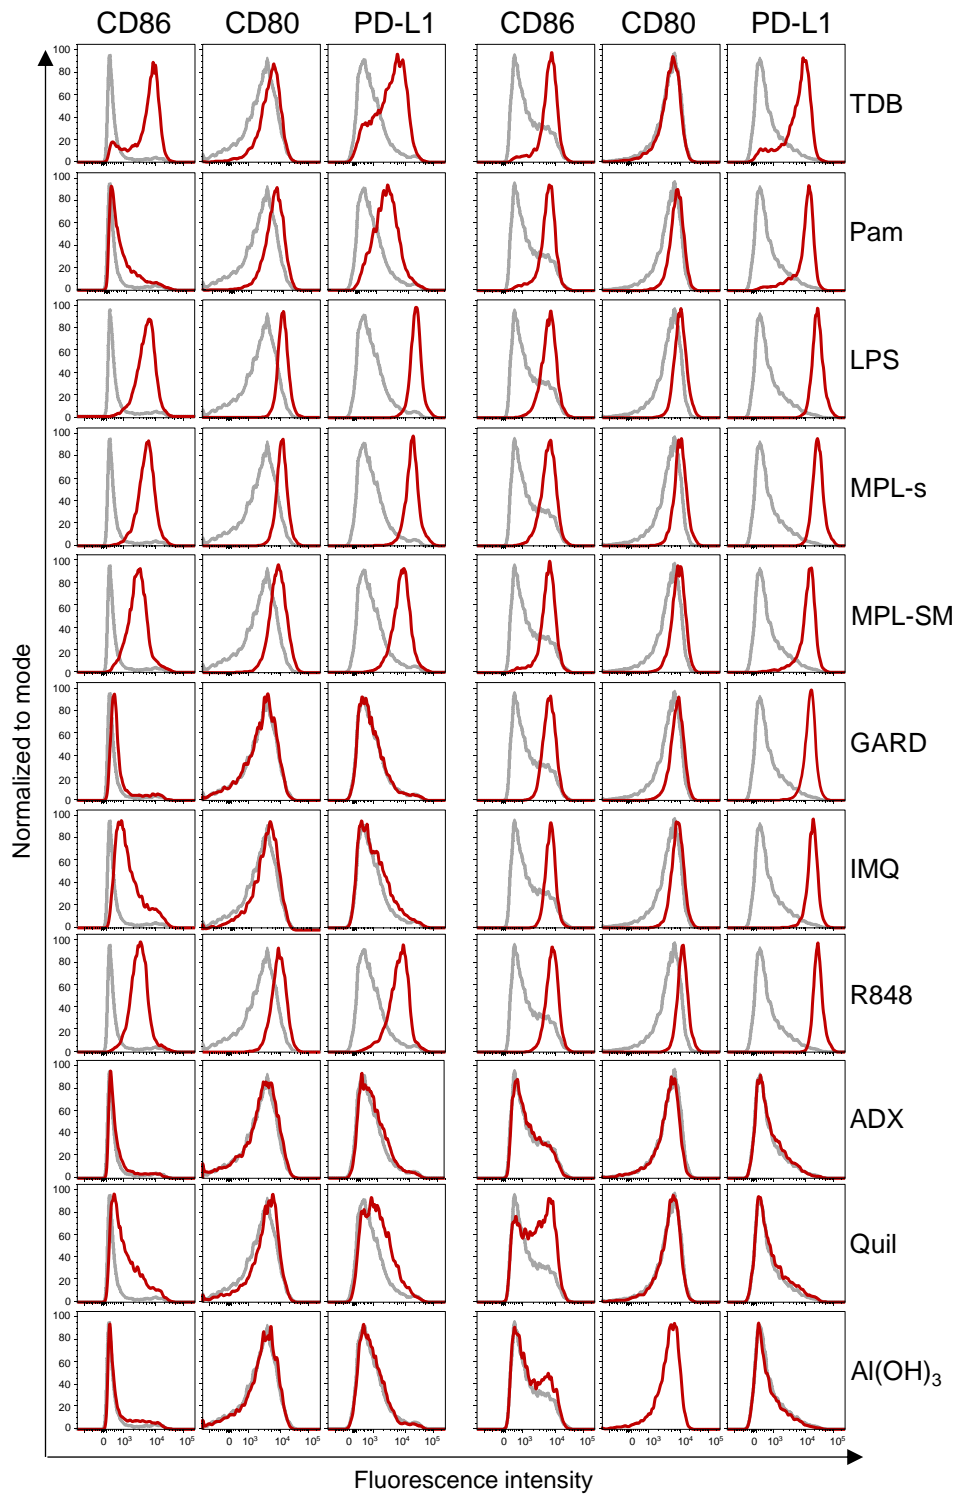

**Fig. S2: The TLR7 ligands GARD and IMQ increase the expression of CD80, CD86 and PD-L1 on DC<sub>PBL</sub>, but not on DC<sub>solo</sub>.**

Representative histogram overlays of the maturation markers CD80, CD86 and PD-L1 showing the differences in fluorescence intensity between DC<sub>solo</sub> and DC<sub>PBL</sub> when stimulated with the adjuvants GARD or IMQ. The solid grey line represents the fluorescence intensity of the unstimulated control of the respective culture, whereas the solid red line represents the fluorescence intensity of the respective adjuvant stimulation.

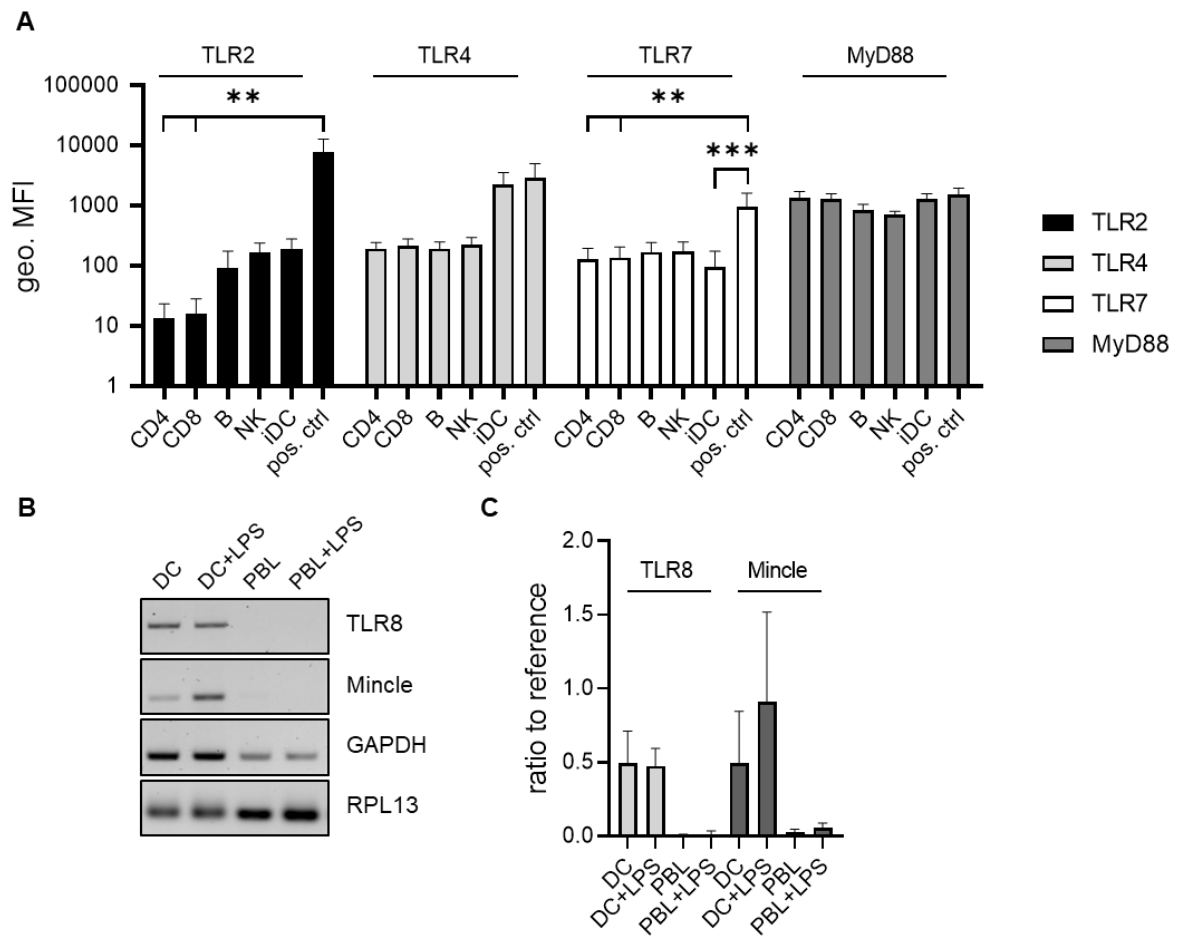

**Fig. S3: Expression of TLRs, MyD88 and Mincle on moDCs or PBLs**

A) Immature DCs or PBLs were stained for their specific phenotype as well as the receptor or adapter proteins as indicated, and were subsequently analyzed by flow cytometry (n=4-11). B, C) Isolated mRNA from untreated or LPS-treated (10ng/ml) DCs or PBLs was reversely transcribed into cDNA, and gene-specific primers were used to amplify TLR8 or Mincle as well as GAPDH or RPL13 transcripts. B) PCR products visualized from an agarose gel showing representative gene expression. C) Densitometric analysis of PCR products from agarose gels. DC samples were normalized to the GAPDH reference whereas PBL samples were normalized to the more suitable RPL13 reference (n=6).

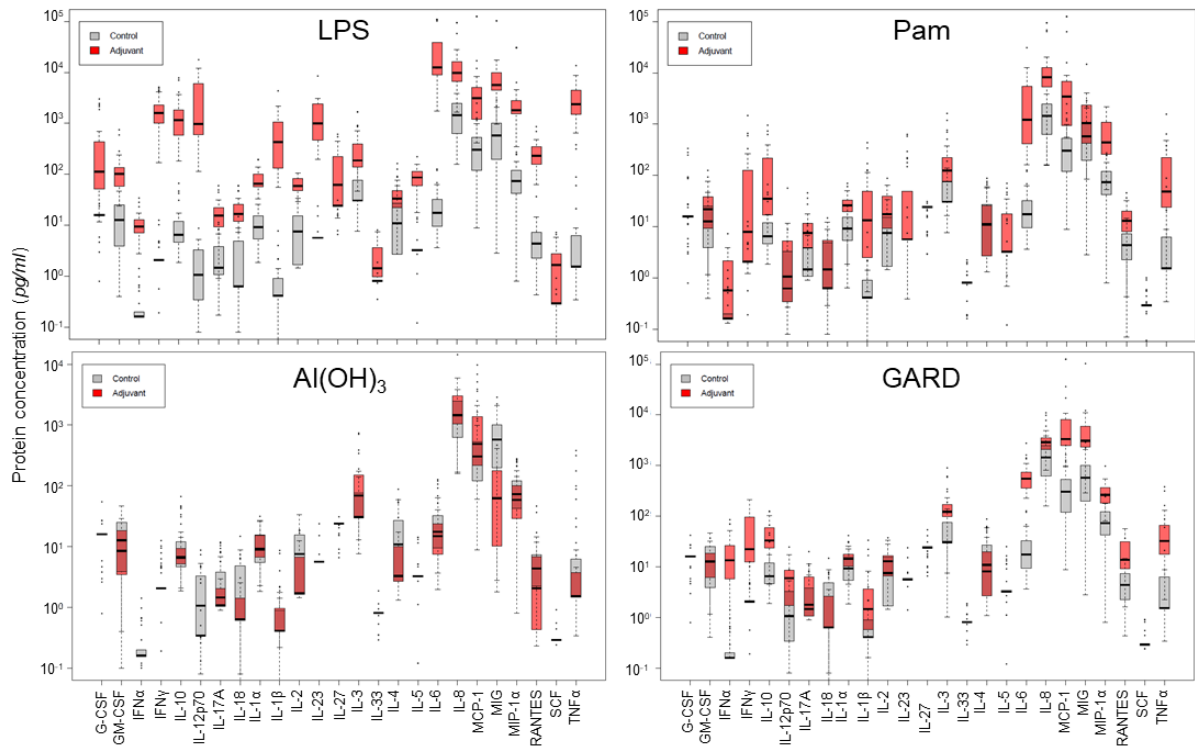

**Fig. S4: Induction of cytokine and chemokine expression varies between adjuvants.**

The DC:PBL co-culture was stimulated with the different adjuvants or was left untreated (null response). After 24 hours, supernatant was harvested and analyzed for cytokine and chemokine secretion (25 proteins in total) using the Luminex xMAP technology. Box-whisker plots (Tukey) represent the induced cytokine and chemokine response of four exemplified stimuli (high concentration). Induced responses of alphabetically listed analytes are colored in red, the null response is overlaid in grey. Data points beyond the whiskers are outliers (n=30 donors).

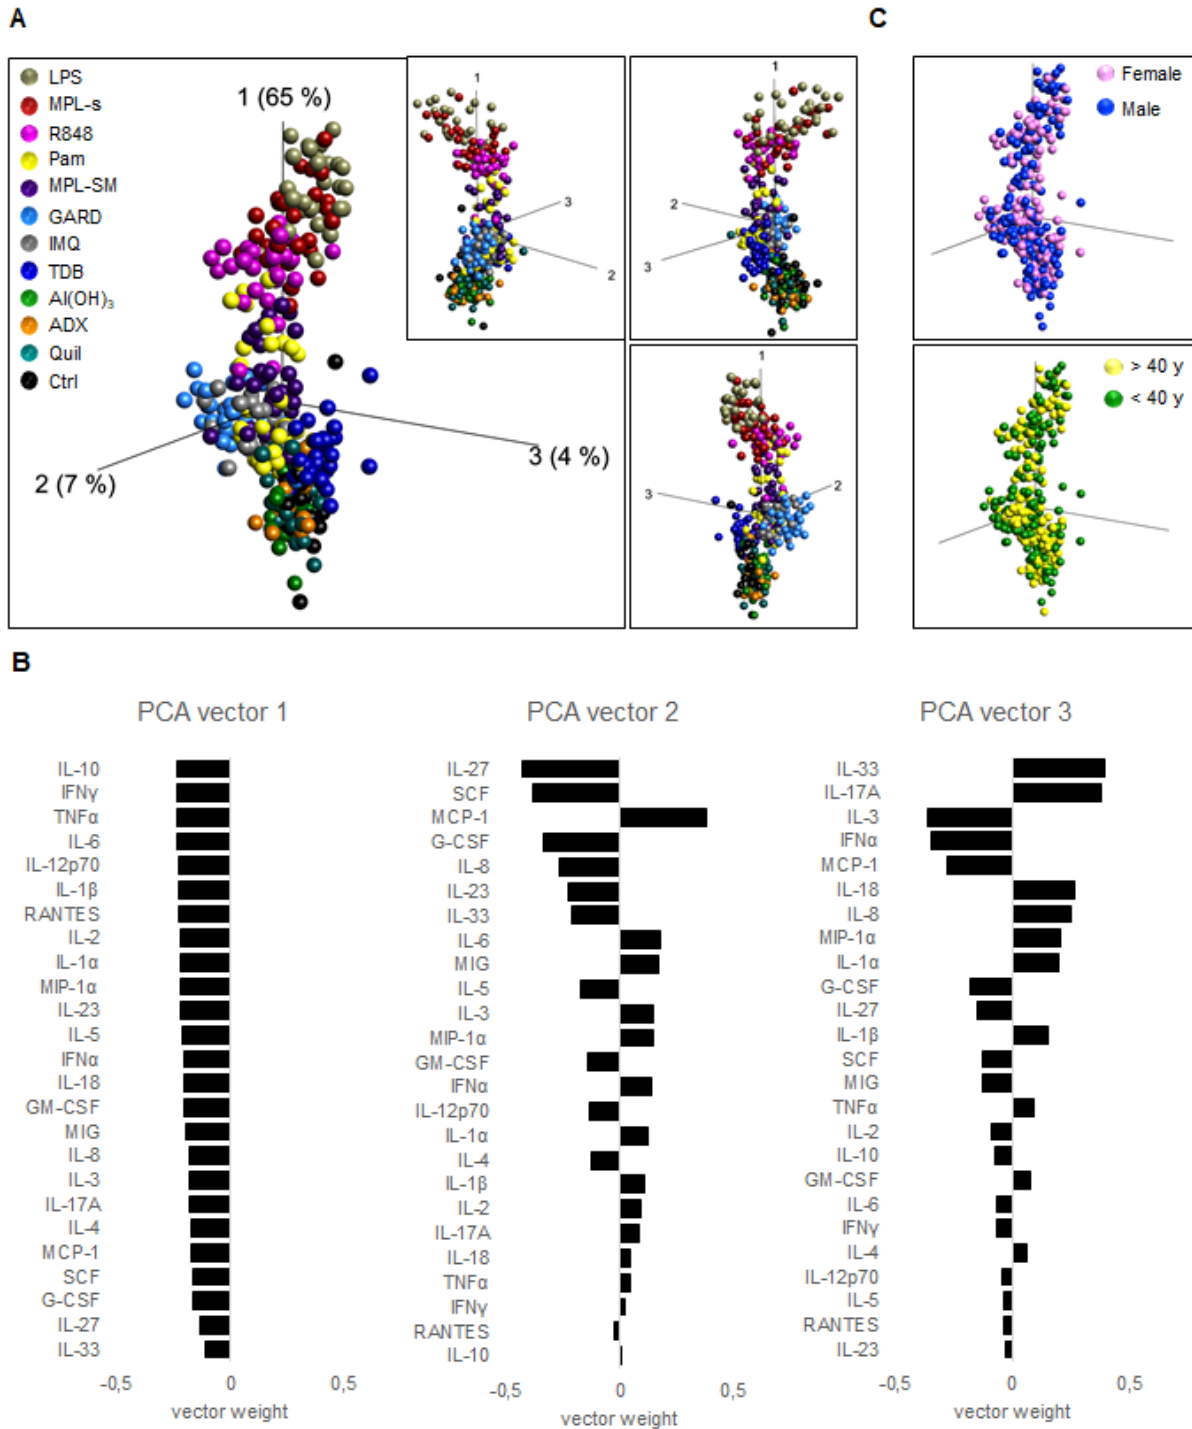

**Fig. S5: Adjuvants are characterized by their differential cytokine and chemokine expression profiles.**

The DC:PBL co-culture was stimulated with the different adjuvants or left untreated (control) for 24 hours. Subsequently, the supernatant was analyzed for cytokine and chemokine secretion (25 proteins in total) using the Luminex xMAP technology. A) Principal component analysis with each dot representing one donor (n=30) and each color one of the 12 different conditions (Ctrl or high adjuvant concentrations). The PCA plot captures 76 %

of the total variance within the selected data set (PCA-1: 65%, PCA-2: 4%, PCA-3: 7%). Data was set to a mean of zero, scaled to unit variance and logarithmized before performing the PCA. Q-value was not adjusted here (q-value=1). B) Bar graphs representing the contribution of each protein analyte to the 3 principal component axes. The positioning of the bars is arbitrary and is not considered positive or negative, except in relation to the other analytes. C) PCA plots showing the distribution of induced cytokine and chemokine expression within donors of different age or gender.

**A**

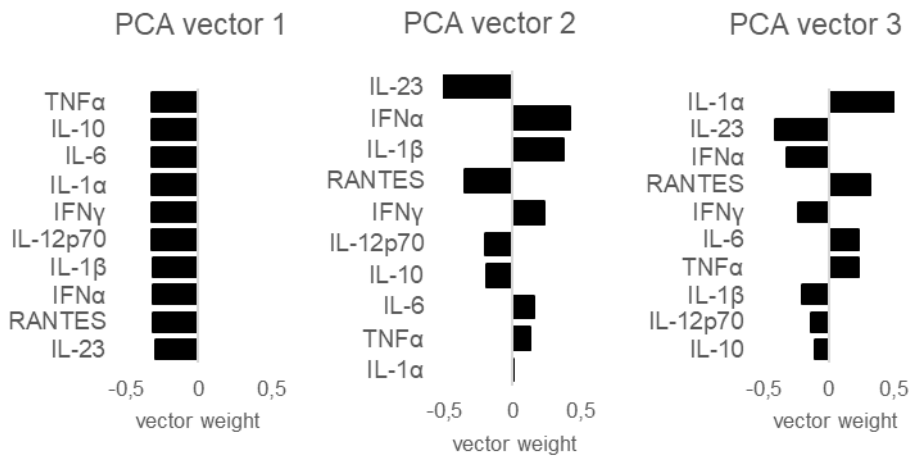

**B**

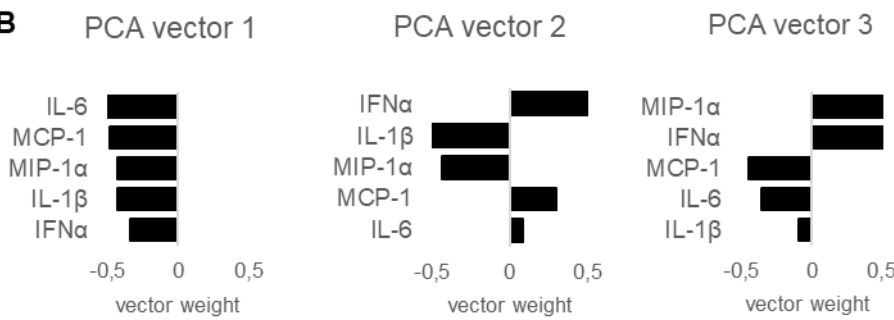

**C**

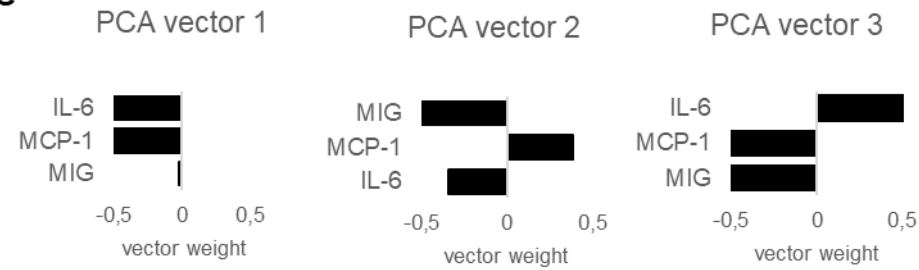

**Fig. S6: Contribution of protein analytes to PC axes in the analysis of strong, intermediate or weak immunomodulators.**

Bar graphs show the contribution of each protein analyte to the respective axis of the PCA plot for A) strong immunomodulators, B) intermediate immunomodulators, or C) weak immunomodulators in Figure 3B-E). The positioning of the bars is arbitrary and is not considered positive or negative, except in relation to the other analytes.

**A**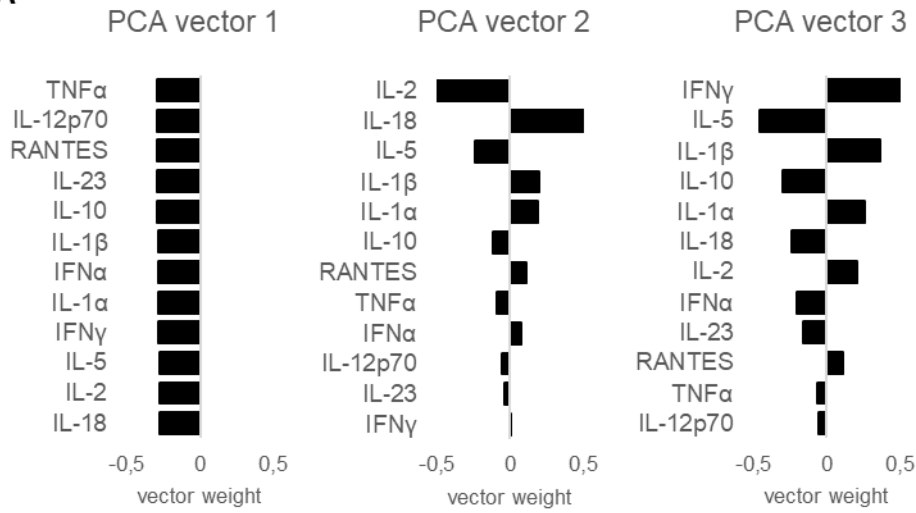**B**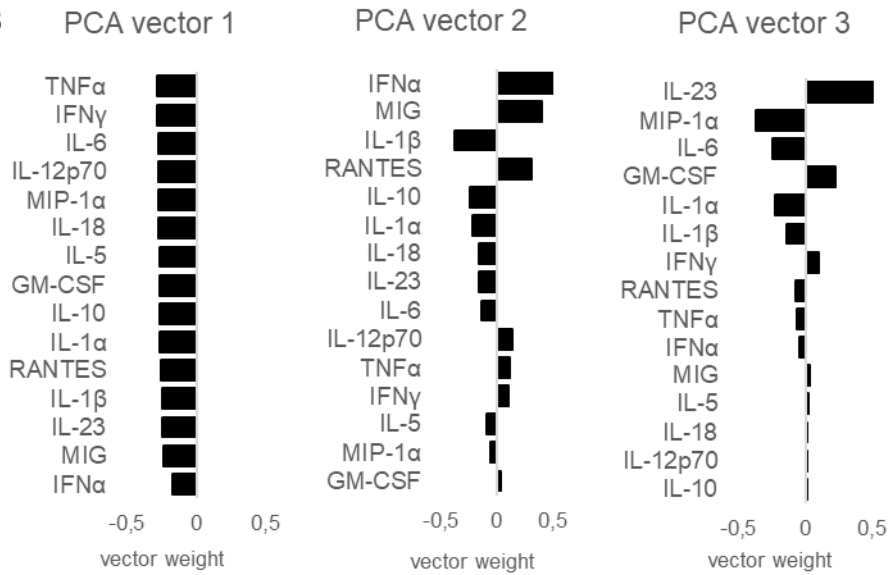**C**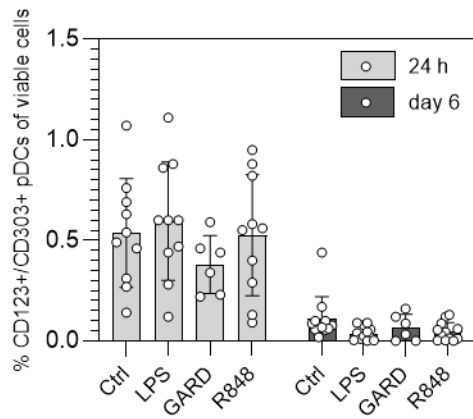**D**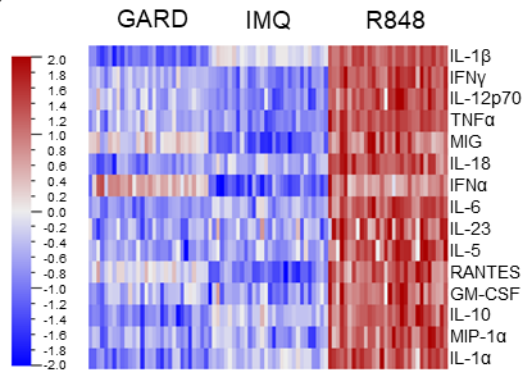



**Fig. S7: Expression profiles and contribution of analytes to PCA for TLR4 or TLR7 and TLR7/8 agonists**

Contribution of protein analytes from Luminex analysis to each PC vector of the PCA shown for A) TLR4 ligands or B) TLR7 and TLR7/8 ligands corresponding to Figure 4 A and B). C) Proportion of pDCs within the DC:PBL co-culture 24h or 6 days after high concentration adjuvant treatment, shown as mean  $\pm$  SD. Cells were stained for the specific surface markers and were analyzed by flow cytometry (n=6-12). D) Expression levels (Luminex analysis) of the 15 most differentially expressed proteins (q-value  $< 1 \times 10^{-15}$ ) from cells stimulated with the TLR7 ligands GARD, IMQ or the TLR 7/8 ligand R848, displayed as heat map.

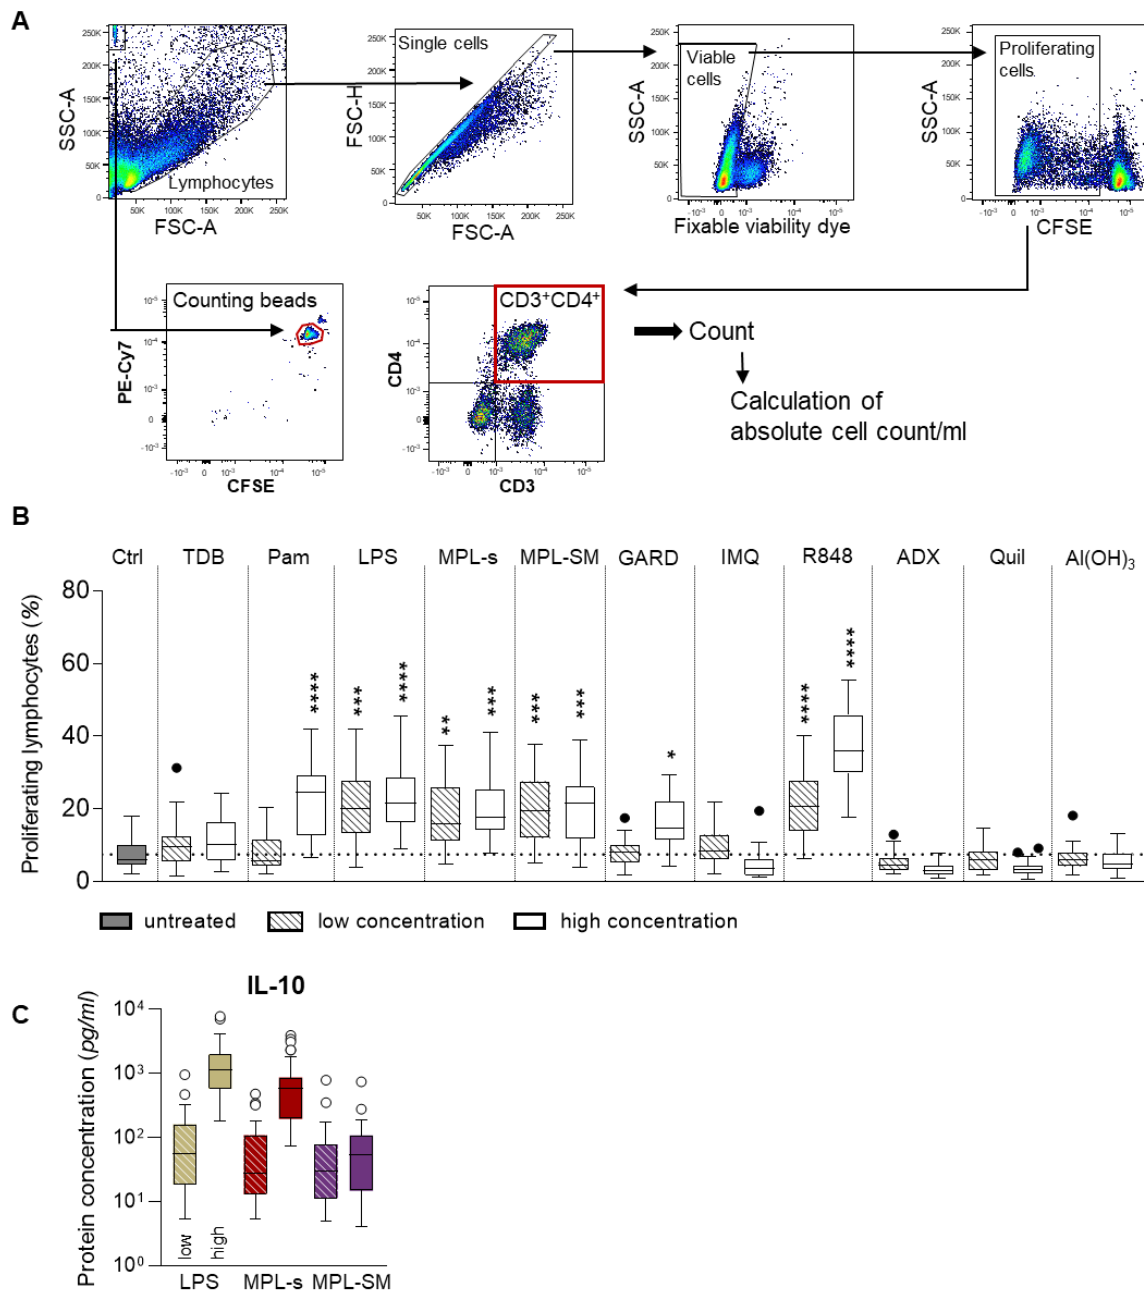

**Fig. S8: Adjuvants stimulate the proliferation of lymphocytes to different degrees.**

CFSE-labeled DC:PBL co-cultures were stimulated with the different adjuvants for 6 days, followed by antibody staining and flow cytometry analysis. A) Gating strategy to assess the proliferation of different lymphocyte populations (as shown in figure 5). Doublets and apoptotic cells were excluded. Proliferating cells were identified by exposing a lower intensity of the CFSE dye. Within the proliferating lymphocytes, various sub-populations were identified by specific antibody staining. Here, an example for  $CD3^+CD4^+$  T cells is shown. Counting beads were acquired during sample analysis allowing the calculation of the absolute cell count of proliferating  $CD3^+CD4^+$  T cells within the respective sample. B) Box Whisker plots represent adjuvant-induced total

lymphocyte proliferation. Statistical comparisons of the unstimulated control and the adjuvant was performed using the Kruskal-Wallis test with Dunn's correction (\*  $p < 0.05$ , \*\*  $p < 0.01$ , \*\*\*  $p < 0.001$ , \*\*\*\*  $p < 0.0001$ ) (n=26 donors). If not otherwise specified, comparison revealed no significance. Data is representative for at least three independent experiments. C) IL-10 protein concentrations measured by Luminex analysis after stimulation with TLR4 ligands LPS, MPL-s or MPL-SM. Data are neither transformed nor batch corrected.

**A**

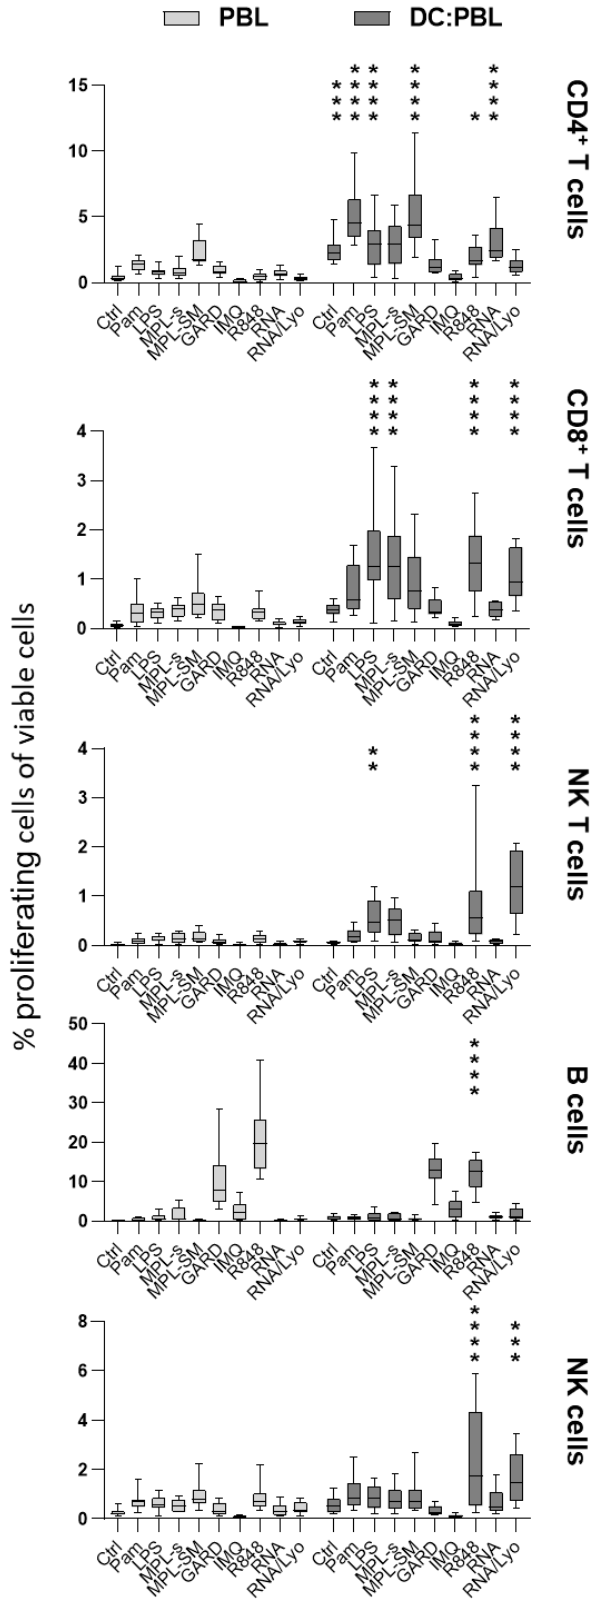

**B**

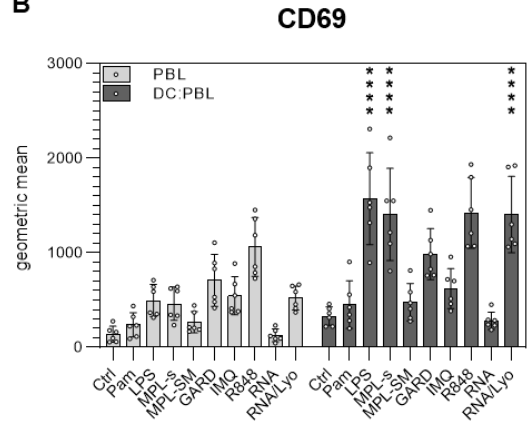

**C**

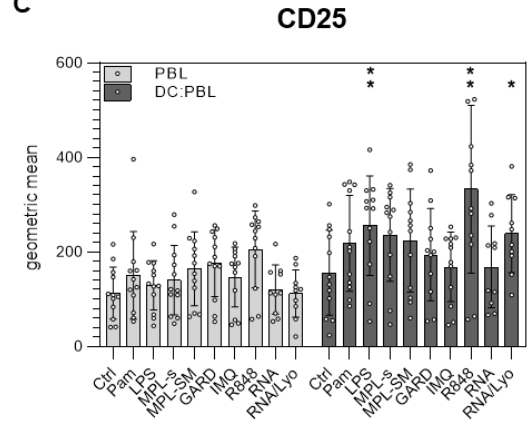

**Fig. S9: Influence of moDCs on proliferation and activation of lymphocytes**

PBLs in absence or presence of moDCs were treated with the high concentrations of the different adjuvants/stimuli for 5 days, and A) proliferation of lymphocyte subpopulations or expression of B) CD69 or C) CD25 was determined by flow cytometry (n=10-12;  $\geq 4$  independent experiments; shown as mean  $\pm$  SD). B, C) Unspecific antibody binding was tested by isotype control. Statistical significance was calculated employing two-way ANOVA with Sidak's multiple comparison test (\*  $p < 0.05$ , \*\*  $p < 0.01$ , \*\*\*  $p < 0.001$ , \*\*\*\*  $p < 0.0001$ ), displaying the significant differences in proliferation between the DC:PBL co-culture and the respective condition of PBL only.

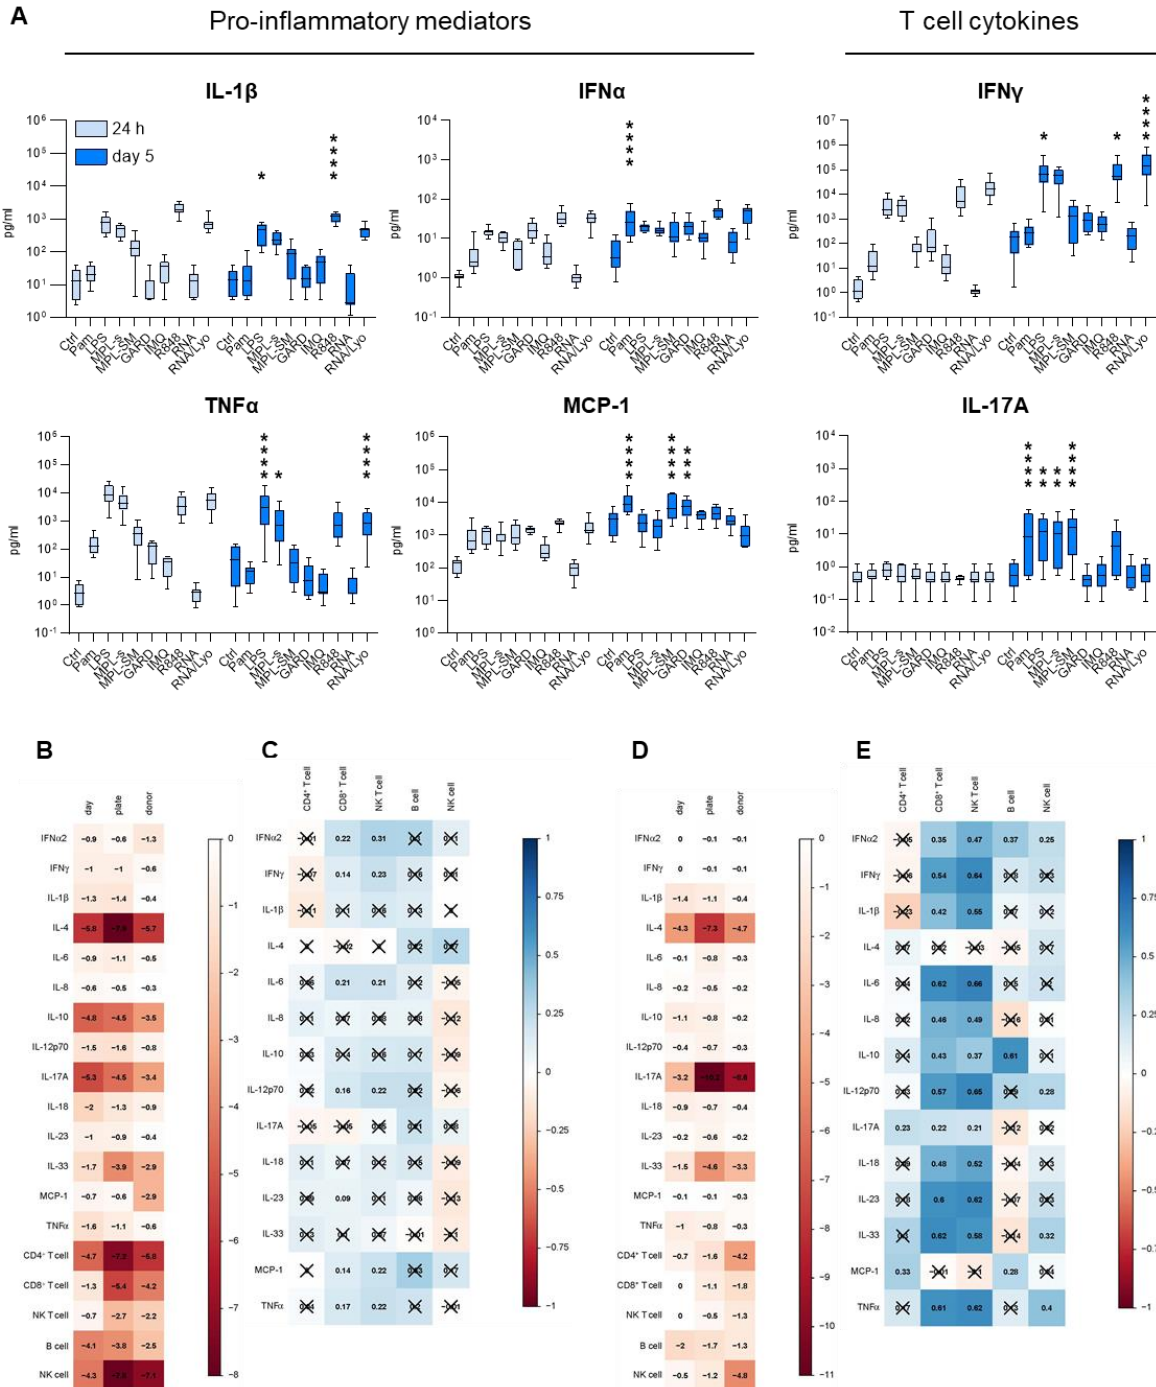

**Fig: S10: Expression of cytokines or chemokines 24 h or 5 days upon adjuvant treatment positively correlates with lymphocyte proliferation.**

A) DC:PBL co-cultures were treated with the high concentrations of the different adjuvants/stimuli for 24 h or 5 days. Cytokine and chemokine concentrations, displayed as box-whisker (min to max) plots, were measured by flow cytometry from  $\geq 3$  independent experiments (n=10) employing the Legendplex™ 'Human Inflammation panel 1' (n=10). Statistical analysis, determining the significant differences in analyte concentration between day

5 and 24 h of the respective condition, was performed using two-way ANOVA with Sidak's multiple comparison test (\*  $p < 0.05$ , \*\*  $p < 0.01$ , \*\*\*  $p < 0.001$ , \*\*\*\*  $p < 0.0001$ ). Data sets (n=10) of adjuvant-induced cytokine and chemokine secretion after B, C) 24 h or D, E) 5 days were linked to adjuvant-induced lymphocyte proliferation assessed after 5 days using Spearman's rank correlation. B, D) The influence of several factors on the levels of cytokine and chemokine concentration as well as of absolute lymphocyte count has been assessed individually by Kruskal-Wallis testing. The presented values are the common logarithms of the p-values analyzed by the Kruskal-Wallis test. White color represents a high p-value, whereas red color indicates a very low p-value. All analyses are exploratory without corrections for multiple testing. C, E) The correlation matrix is based on normalized values which were obtained by setting the unstimulated control for each donor to 1. Spearman correlation coefficients associated with a p-value above 0.01 are crossed out. A value of +1 (blue) indicates a positive, whereas a value of -1 (red) represents negative correlation.

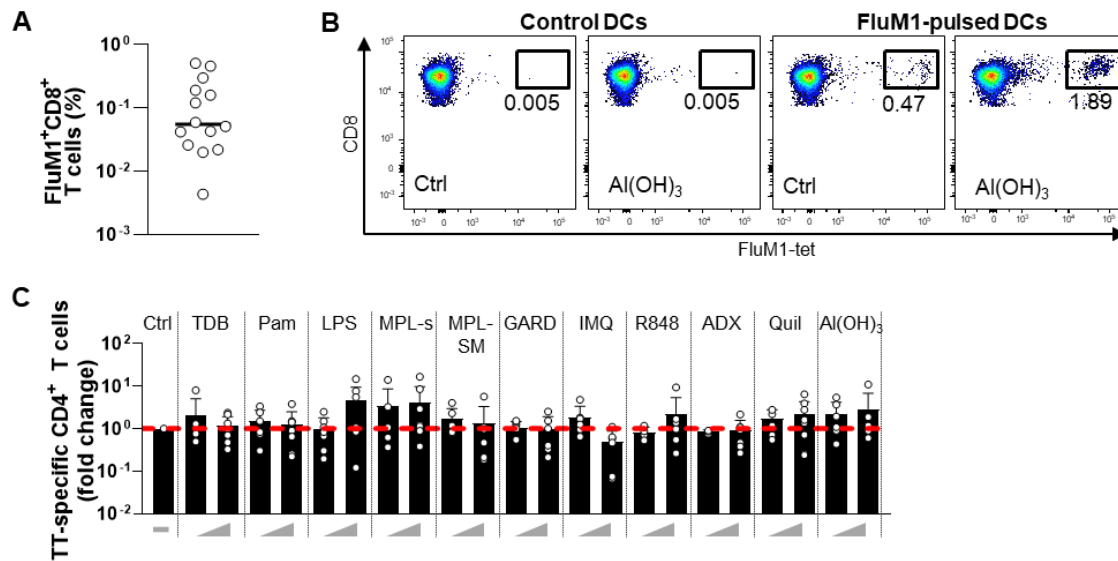

**Fig. S11: Effects of adjuvants on the antigen-specific CD8<sup>+</sup> or CD4<sup>+</sup> T cell population.**

DCs loaded with the FluM1<sub>58-66</sub> peptide (GILGFVFTL) were co-cultured with autologous CD8<sup>+</sup> T cells and stimulated with the different adjuvants. A) Donor individual baseline levels of FluM1-specific CD8<sup>+</sup> T cells as measured using the corresponding MHC class I tetramer (GILGFVFTL HLA-A\*0201-PE) after CD8<sup>+</sup> T cell isolation (n=14). B) Representative dot plots of the FluM1-specific CD8<sup>+</sup> T cell population on day 7 of the DC<sup>FluM1</sup>:CD8 co-culture, which was stimulated either with Al(OH)<sub>3</sub> or left untreated (ctrl). DCs not loaded with the FluM1 peptide served as control (control DCs). C) DCs loaded with the TT p<sub>2829-844</sub> peptide (MQYIKANSKFIGITEL) were co-cultured with autologous CD4<sup>+</sup> T cells and stimulated with the different adjuvants. The negative control was left untreated. On day 6 or 7, CD4<sup>+</sup> T cells were stained with a peptide-corresponding MHC class II tetramer (MQYIKANSKFIGITEL HLA-DRB1\*1101-PE) and anti-CD3 and -CD4 antibodies for analysis by flow cytometry. Single, viable cells were used for pairwise comparison of the adjuvant-stimulated condition with the unstimulated control employing the Wilcoxon test (no significance revealed; n=6-8). Data is representative for at least three independent experiments.



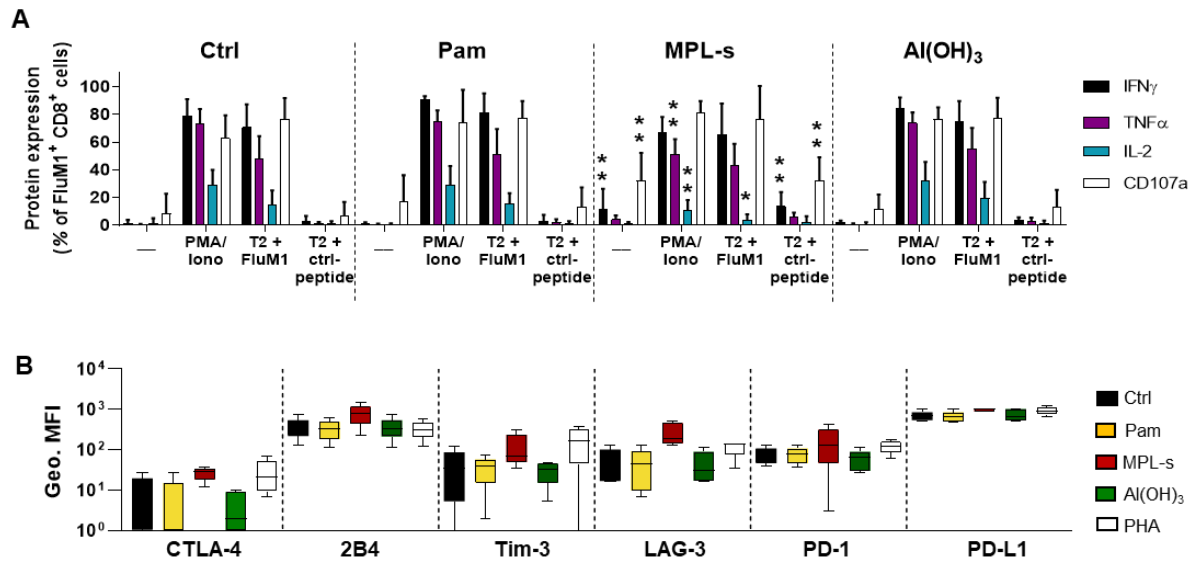

**Fig. S12: Polyfunctionality of Pam-, MPL-s- and Al(OH)<sub>3</sub>-treated CD8<sup>+</sup> T cells upon FluM1-restimulation.**

A) FluM1-specific CD8<sup>+</sup> T cells were expanded without adjuvant or with Pam, MPL-s or Al(OH)<sub>3</sub>. Expression of IFN $\gamma$ , TNF $\alpha$ , IL-2 and CD107a were measured in FluM1-specific CD8<sup>+</sup> T cells after being stimulated with PMA/Iono (positive control), peptides being presented on T2 cells (FluM1 or control; n=5-10). B) Analysis of inhibitory ligand expression on CD8<sup>+</sup> T cells after being stimulated for 6-7 days with Pam, MPL-s, Al(OH)<sub>3</sub>, PHA or left untreated (Ctrl; n=5). Statistical differences between the adjuvant stimulations and the unstimulated control were compared by (A) Kruskal-Wallis or (B) Friedman test with Dunn's correction (n=5). A p-value of \* p < 0.05, \*\* p < 0.01 was considered as statistically significant. Data are representative of at least three independent experiments.

## Abbreviations

|                     |                                                          |
|---------------------|----------------------------------------------------------|
| ADX                 | Addavax                                                  |
| Al(OH) <sub>3</sub> | Aluminium hydroxide                                      |
| APC                 | Antigen presenting cell                                  |
| AS01/04             | Adjuvant system 01/04                                    |
| BCR                 | B cell receptor                                          |
| CD                  | Cluster of differentiation                               |
| CFSE                | Carboxyfluorescein succinimidyl ester                    |
| ELISA               | Enzyme-linked immunosorbent assay                        |
| EU/ml               | European Units/ milliliter                               |
| FluM1               | specific peptide of the Influenza A virus matrix protein |
| GARD                | Gardiquimod                                              |
| Geo. MFI            | Geometric mean fluorescence intensity                    |
| G-CSF               | Granulocyte colony-stimulating factor                    |
| GM-CSF              | Granulocyte macrophage colony-stimulating factor         |
| iDC                 | immature DC                                              |
| IFN                 | Interferon                                               |
| IgG/ IgM            | Immunoglobulin G/ M                                      |
| IL-                 | Interleukin                                              |
| IMQ                 | Imiquimod (R837)                                         |
| LAG-3               | Lymphocyte-activation gene 3, CD223                      |
| LPS                 | Lipopolysaccharide                                       |
| MACS                | Magnetic activated cell sorting                          |
| MAT                 | Monocyte activation test                                 |
| MCP-1               | Monocyte chemotactic protein-1; CCL2                     |
| MF59                | Oil-in-water emulsion adjuvant                           |
| MHC                 | Major histocompatibility complex                         |
| MIG                 | Monokine induced by gamma interferon; CXCL9              |
| MoA                 | Mode of action                                           |
| moDC                | monocyte-derived DC                                      |

|          |                                                               |
|----------|---------------------------------------------------------------|
| MPL      | Monophosphoryl lipid A                                        |
| MPL-s    | synthetic monophosphoryl lipid A                              |
| MPL-SM   | Monophosphoryl lipid A derived from Salmonella minnesota R595 |
| MyD88    | Myeloid differentiation primary response 88                   |
| n        | Number of donors                                              |
| NK cell  | Natural killer cell                                           |
| NKT cell | Natural killer T cell                                         |
| Pam      | Pam3CSK4                                                      |
| PAMP     | Pattern associated molecular pattern                          |
| PBL      | Peripheral blood lymphocyte                                   |
| PBMC     | Peripheral blood mononuclear cells                            |
| PCA      | Principal component analysis                                  |
| pDC      | plasmacytoid DC                                               |
| PD-L1    | Programmed death ligand 1                                     |
| PHA      | Phytohemagglutinin                                            |
| PI       | Propidium iodid                                               |
| PMA      | Phorbol myristate acetate                                     |
| PRR      | Pattern recognition receptor                                  |
| Quil     | Quil-A                                                        |
| R848     | Resiquimod                                                    |
| ss polyU | Single-stranded RNA polymer; polyuridylic acid                |
| SCF      | Stem cell factor                                              |
| SD       | Standard deviation                                            |
| TDB      | Trehalose-6,6-dibehenate                                      |
| Th cell  | T helper cell                                                 |
| TLR      | Toll-like receptor                                            |
| TNF      | Tumor necrosis factor                                         |
| TT       | Tetanus toxoid                                                |
| WHO      | World Health Organization                                     |

## References

1. J. Ostrop, K. Jozefowski, S. Zimmermann, K. Hofmann, E. Strasser, B. Lepenies, R. Lang, Contribution of MINCLE-SYK Signaling to Activation of Primary Human APCs by Mycobacterial Cord Factor and the Novel Adjuvant TDB. *Journal of immunology (Baltimore, Md. : 1950)* **195**, 2417–2428 (2015).
2. G. Caron, D. Duluc, I. Frémaux, P. Jeannin, C. David, H. Gascan, Y. Delneste, Direct stimulation of human T cells via TLR5 and TLR7/8: flagellin and R-848 up-regulate proliferation and IFN-gamma production by memory CD4+ T cells. *Journal of immunology (Baltimore, Md. : 1950)* **175**, 1551–1557 (2005).
